# Supplementary material for: The V Protein of Tioman Virus Is Incapable of Blocking Type I Interferon Signaling in Human Cells
Source: PLOS journal article supplement (doi:10.1371/journal.pone.0053881), 2013-01-14
Supplement: S1 (10.1371/journal.pone.0053881.s001) [file journal.pone.0053881.s001]

*P. rodricensis* MAQWEMLQNLDS\* FQDQLHQLY\* TNSLLPVDI RQYLAVWI EDQNWQEAALGKDDSQANMLFFHFDLQKYECGRCSQDPECLLQHNLRKFCRD IQAF 97  
*P. vamyryus* (edited) MAQWEMLQNLDS\* FQDQLHQLY\* TNSLLPVDI RQYLAVWI EDQNWQEAALGKDDSQANMLFFHFDLQKYECGRCSQDPECLLQHNLRKFCRD IQAF 97  
*P. vamyryus* (unedited) MAQWEMLQNLDS\* FQDQLHQLY\* TNSLLPVDI RQYLAVWI EDQNWQEAALGKDDSQANMLFFHFDLQKYECGRCSQDPECLLQHNLRKFCRD IQAF 96  
Human MAQWEMLQNLDS\* FQDQLHQLY\* SHSLLPVDI RQYLAVWI EDQNWQEAALGKDDSKATMLFFHFDLQNNYECGRCSQDPECLLQHNLRKFCRD IQAF 97  
Panda MAQWEMLQNLDS\* FQDQLHQLY\* SESLLPMDI RQYLAVWI EDQNWQEAALGNDSSKATVLFHFDLQNNYECGRCSQDPECLLQHNLRKFCRD IQAF 97  
Ferret MAQWEMLQNLNPFQDQLHQLYSDSLLPVDI RQYLAVWI EDQNWQEAALGNDSSKATVLFHFDLQNNYECGRCSQDPECLLQHNLRKFCRD IQAF 97  
Dog MAQWEMLQNLNPFQDQLHQLYSDSLLPVDI RQYLAVWI EDQNWQEAALGNDSSKATVLFHFDLQNNYECGRCSQDPECLLQHNLRKFCRD IQAF 97  
Horse MAQWEMLQNLDS\* FQDQLHQLY\* SNI LLPMDI RQYLAVWI EDQNWQEAALGNDSSKANMLFFHFDLQNTSECCGRCSQDPECLLQHNLRKFCRD IQAF 97  
Pig MAQWEMLQNLDS\* FQDQLHQLY\* SESLLPVDI RQYLAVWI EDQNWQEAALGNDSSKANMLFFHFDLQNTSECCGRCSQDPECLLQHNLRKFCRD IQAF 97  
Cow MAQWEMLQNLDS\* FQDQLHQLY\* SNI LLPMDI RQYLAVWI EDQNWQEAALGNDSSKANMLFFHFDLQNTSECCGRCSQDSEYFLLQHNLRKFCRD IQAF 97

*P. rodricensis* PQGPTQLAEMI FNLLLEEKRI L IQAQAQLEQGEVFEVPEVSESQPEIESRI ELRVMMKLVKS I SQLKDDQDVF CFYK THTLRTA\* ASDLPHQIR 194  
*P. vamyryus* (edited) PQGPTQLAEMI FNLLLEEKRI L IQAQAQLEQGEVFEVPEVSESQPEIESRI ELRVMMKLVKS I SQLKDDQDVF CFYK THTLVRT ASDLPHQIR 194  
*P. vamyryus* (unedited) PQGPTQLAEMI FNLLLEEKRI L IQAQAQLEQGEVFEVPEVSESQPEIESRI ELRVMMKLVKS I SQLKDDQDVF CFYK THTLVRT ASDLPHQIR 193  
Human PQGPTQLAEMI FNLLLEEKRI L IQAQAQLEQGEVFEVPEVSESQPEIESRI ELRVMMKLVKS I SQLKDDQDVF CFYK THTLVRT ASDLPHQIR 194  
Panda PQGPTQLAEMI FNLLLEEKRI L IQAQAQLEQGEVFEVPEVSESQPEIESRI ELRVMMKLVKS I SQLKDDQDVF CFYK THTLVRT ASDLPHQIR 194  
Ferret PQGPTQLAEMI FNLLLEEKRI L IQAQAQLEQGEVFEVPEVSESQPEIESRI ELRVMMKLVKS I SQLKDDQDVF CFYK THTLVRT ASDLPHQIR 194  
Dog PQGPTQLAEMI FNLLLEEKRI L IQAQAQLEQGEVFEVPEVSESQPEIESRI ELRVMMKLVKS I SQLKDDQDVF CFYK THTLVRT ASDLPHQIR 194  
Horse PQGPTQLAEMI FNLLLEEKRI L IQAQAQLEQGEVFEVPEVSESQPEIESRI ELRVMMKLVKS I SQLKDDQDVF CFYK THTLVRT ASDLPHQIR 192  
Pig PQGPTQLAEMI FNLLLEEKRI L IQAQAQLEQGEVFEVPEVSESQPEIESRI ELRVMMKLVKS I SQLKDDQDVF CFYK THTLVRT ASDLPHQIR 194  
Cow PTGSTRQAEMI FNLLLEEKRI L TWAQRAQLEQGEVFEVPEVSESQPEIESRI ELRVMMKLVKS I SQLKDDQDVF CFYK THTLVRT ASDLPHQIR 194

*P. rodricensis* QQQLLQETLNELDKRRKEVLDS KALLGR LTTLELLPKLEEWKVVQQKAC I GSR EDGGLS QLEKWFTDGAKLL FHLRQLL KKLKGLSHLVSYH 291  
*P. vamyryus* (edited) QQQLLQETLNELDKRRKEVLDS KALLGR LTTLELLPKLEEWKVVQQKAC I GSR EDGGLS QLEKWFTDGAKLL FHLRQLL KKLKGLSHLVSYH 291  
*P. vamyryus* (unedited) QQQLLQETLNELDKRRKEVLDS KALLGR LTTLELLPKLEEWKVVQQKAC I GSR EDGGLS QLEKWFTDGAKLL FHLRQLL KKLKGLSHLVSYH 290  
Human EQK L LQETLNELDKRRKEVLDS KALLGR LTTLELLPKLEEWKVVQQKAC I GAP LDAGLE -- QLEKWFTAGAKLL FHLRQLL KKLKGLSHLVSYH 289  
Panda QRQLLQETLNELDKRRKEVLDS KALLGR LTTLELLPKLEEWKVVQQKAC I GAP LDAGLE -- QLEKWFTAGAKLL FHLRQLL KKLKGLSHLVSYH 289  
Ferret QQQLLQETLNELDKRRKEVLDS KALLGR LTTLELLPKLEEWKVVQQKAC I GAP LDAGLE -- QLEKWFTAGAKLL FHLRQLL KKLKGLSHLVSYH 289  
Dog QQQLLQETLNELDKRRKEVLDS KALLGR LTTLELLPKLEEWKVVQQKAC I GAP LDAGLE -- QLEKWFTAGAKLL FHLRQLL KKLKGLSHLVSYH 289  
Horse QQQLLQETLNELDKRRKEVLDS KALLGR LTTLELLPKLEEWKVVQQKAC I GAP LDAGLE -- QLEKWFTAGAKLL FHLRQLL KKLKGLSHLVSYH 289  
Pig QEQV LQETLNELDKRRKEVLDS KALLGR LTTLELLPKLEEWKVVQQKAC I GAP LDAGLE -- QLEKWFTAGAKLL FHLRQLL KKLKGLSHLVSYH 289  
Cow QMDI LQETLNELDKRRKEVLDS KALLGR LTTLELLPKLEEWKVVQQKAC I GAP LDAGLE -- QLEKWFTAGAKLL FHLRQLL KKLKGLSHLVSYH 289

*P. rodricensis* HDPLTTGVDLRE AQVTELLQRL L RAFVVEVETQPCMPQTPHR PL I LRTGSKFTVTRTL LVR LQEGNETL TAEV I DRNPLQSQG -- FRKFNILTSNRK 386  
*P. vamyryus* (edited) HDPLTTGVDLRE AQVTELLQRL L RAFVVEVETQPCMPQTPHR PL I LRTGSKFTVTRTL LVR LQEGNETL TAEV I DRNPLQSQG -- FRKFNILTSNRK 386  
*P. vamyryus* (unedited) HDPLTTGVDLRE AQVTELLQRL L RAFVVEVETQPCMPQTPHR PL I LRTGSKFTVTRTL LVR LQEGNETL TAEV I DRNPLQSQG -- FRKFNILTSNRK 385  
Human HDPLTTGVDLRE AQVTELLQRL L RAFVVEVETQPCMPQTPHR PL I LRTGSKFTVTRTL LVR LQEGNETL TAEV I DRNPLQSQG -- FRKFNILTSNRK 384  
Panda HDPLTTGVDLRE AQVTELLQRL L RAFVVEVETQPCMPQTPHR PL I LRTGSKFTVTRTL LVR LQEGNETL TAEV I DRNPLQSQG -- FRKFNILTSNRK 384  
Ferret HDPLTTGVDLRE AQVTELLQRL L RAFVVEVETQPCMPQTPHR PL I LRTGSKFTVTRTL LVR LQEGNETL TAEV I DRNPLQSQG -- FRKFNILTSNRK 384  
Dog HDPLTTGVDLRE AQVTELLQRL L RAFVVEVETQPCMPQTPHR PL I LRTGSKFTVTRTL LVR LQEGNETL TAEV I DRNPLQSQG -- FRKFNILTSNRK 386  
Horse EDPLHKGVLDLQK AQVTELLQRL L RAFVVEVETQPCMPQTPHR PL I LRTGSKFTVTRTL LVR LQEGNETL TAEV I DRNPLQSQG -- FRKFNILTSNRK 382  
Pig EDPLHKGVLDLQK AQVTELLQRL L RAFVVEVETQPCMPQTPHR PL I LRTGSKFTVTRTL LVR LQEGNETL TAEV I DRNPLQSQG -- FRKFNILTSNRK 384  
Cow GDPLNKGVLDLRE AQVTELLQRL L RAFVVEVETQPCMPQTPHR PL I LRTGSKFTVTRTL LVR LQEGNETL TAEV I DRNPLQSQG -- FRKFNILTSNRK 386

*P. rodricensis* TLTPKEGQSGL I WDF SYLTLLEQRSGSGKGNKGLLGVTEELH I SFTVKYTYQGLKQELKTD TLPVVI I SNMQLS I AWASVWLFNLLSSNPQN 483  
*P. vamyryus* (edited) TLTPKEGQSGL I WDF SYLTLLEQRSGSGKGNKGLLGVTEELH I SFTVKYTYQGLKQELKTD TLPVVI I SNMQLS I AWASVWLFNLLSSNPQN 483  
*P. vamyryus* (unedited) TLTPKEGQSGL I WDF SYLTLLEQRSGSGKGNKGLLGVTEELH I SFTVKYTYQGLKQELKTD TLPVVI I SNMQLS I AWASVWLFNLLSSNPQN 474  
Human TLTPKEGQSGL I WDF SYLTLLEQRSGSGKGNKGLLGVTEELH I SFTVKYTYQGLKQELKTD TLPVVI I SNMQLS I AWASVWLFNLLSSNPQN 481  
Panda TLTPKEGQSGL I WDF SYLTLLEQRSGSGKGNKGLLGVTEELH I SFTVKYTYQGLKQELKTD TLPVVI I SNMQLS I AWASVWLFNLLSSNPQN 481  
Ferret TLTPKEGQSGL I WDF SYLTLLEQRSGSGKGNKGLLGVTEELH I SFTVKYTYQGLKQELKTD TLPVVI I SNMQLS I AWASVWLFNLLSSNPQN 483  
Dog TLTPKEGQSGL I WDF SYLTLLEQRSGSGKGNKGLLGVTEELH I SFTVKYTYQGLKQELKTD TLPVVI I SNMQLS I AWASVWLFNLLSSNPQN 483  
Horse TLTPKEGQSGL I WDF SYLTLLEQRSGSGKGNKGLLGVTEELH I SFTVKYTYQGLKQELKTD TLPVVI I SNMQLS I AWASVWLFNLLSSNPQN 478  
Pig TLTPKEGQSGL I WDF SYLTLLEQRSGSGKGNKGLLGVTEELH I SFTVKYTYQGLKQELKTD TLPVVI I SNMQLS I AWASVWLFNLLSSNPQN 476  
Cow TLTPKEGQSGL I WDF SYLTLLEQRSGSGKGNKGLLGVTEELH I SFTVKYTYQGLKQELKTD TLPVVI I SNMQLS I AWASVWLFNLLSSNPQN 483

*P. rodricensis* QQFFS SPPKAPWS LLGPALSWQF LSYVGRGLDQDLNMLRDKLFEQSKNEDAL LSWADFTKRES PPGLPFWTWLKD I DLVHDHLKDLWNDGR IM 580  
*P. vamyryus* (edited) QQFFS SPPKAPWS LLGPALSWQF LSYVGRGLDQDLNMLRDKLFEQSKNEDAL LSWADFTKRES PPGLPFWTWLKD I DLVHDHLKDLWNDGR IM 580  
*P. vamyryus* (unedited) QQFFS SPPKAPWS LLGPALSWQF LSYVGRGLDQDLNMLRDKLFEQSKNEDAL LSWADFTKRES PPGLPFWTWLKD I DLVHDHLKDLWNDGR IM 578  
Human QQFFS SPPKAPWS LLGPALSWQF LSYVGRGLDQDLNMLRDKLFEQSKNEDAL LSWADFTKRES PPGLPFWTWLKD I DLVHDHLKDLWNDGR IM 571  
Panda QQFFS SPPKAPWS LLGPALSWQF LSYVGRGLDQDLNMLRDKLFEQSKNEDAL LSWADFTKRES PPGLPFWTWLKD I DLVHDHLKDLWNDGR IM 578  
Ferret QQFFS SPPKAPWS LLGPALSWQF LSYVGRGLDQDLNMLRDKLFEQSKNEDAL LSWADFTKRES PPGLPFWTWLKD I DLVHDHLKDLWNDGR IM 578  
Dog QQFFS SPPKAPWS LLGPALSWQF LSYVGRGLDQDLNMLRDKLFEQSKNEDAL LSWADFTKRES PPGLPFWTWLKD I DLVHDHLKDLWNDGR IM 580  
Horse QQFFS SPPKAPWS LLGPALSWQF LSYVGRGLDQDLNMLRDKLFEQSKNEDAL LSWADFTKRES PPGLPFWTWLKD I DLVHDHLKDLWNDGR IM 575  
Pig QQFFS SPPKAPWS LLGPALSWQF LSYVGRGLDQDLNMLRDKLFEQSKNEDAL LSWADFTKRES PPGLPFWTWLKD I DLVHDHLKDLWNDGR IM 573  
Cow QQFFS SPPKAPWS LLGPALSWQF LSYVGRGLDQDLNMLRDKLFEQSKNEDAL LSWADFTKRES PPGLPFWTWLKD I DLVHDHLKDLWNDGR IM 580

*P. rodricensis* GFVRSQERRLLKKT I SGTFLRRFSETSEGGI TCSWVEHQDDDKVLY I SVQPFTEVQLS LPLTK I I RHYQLL TEEN I PENPLR FLYPR I PRDEAFG 677  
*P. vamyryus* (edited) GFVRSQERRLLKKT I SGTFLRRFSETSEGGI TCSWVEHQDDDKVLY I SVQPFTEVQLS LPLTK I I RHYQLL TEEN I PENPLR FLYPR I PRDEAFG 677  
*P. vamyryus* (unedited) GFVRSQERRLLKKT I SGTFLRRFSETSEGGI TCSWVEHQDDDKVLY I SVQPFTEVQLS LPLTK I I RHYQLL TEEN I PENPLR FLYPR I PRDEAFG 668  
Human GFVRSQERRLLKKT I SGTFLRRFSETSEGGI TCSWVEHQDDDKVLY I SVQPFTEVQLS LPLTK I I RHYQLL TEEN I PENPLR FLYPR I PRDEAFG 675  
Panda GFVRSQERRLLKKT I SGTFLRRFSETSEGGI TCSWVEHQDDDKVLY I SVQPFTEVQLS LPLTK I I RHYQLL TEEN I PENPLR FLYPR I PRDEAFG 675  
Ferret GFVRSQERRLLKKT I SGTFLRRFSETSEGGI TCSWVEHQDDDKVLY I SVQPFTEVQLS LPLTK I I RHYQLL TEEN I PENPLR FLYPR I PRDEAFG 677  
Dog GFVRSQERRLLKKT I SGTFLRRFSETSEGGI TCSWVEHQDDDKVLY I SVQPFTEVQLS LPLTK I I RHYQLL TEEN I PENPLR FLYPR I PRDEAFG 675  
Horse GFVRSQERRLLKKT I SGTFLRRFSETSEGGI TCSWVEHQDDDKVLY I SVQPFTEVQLS LPLTK I I RHYQLL TEEN I PENPLR FLYPR I PRDEAFG 672  
Pig GFVRSQERRLLKKT I SGTFLRRFSETSEGGI TCSWVEHQDDDKVLY I SVQPFTEVQLS LPLTK I I RHYQLL TEEN I PENPLR FLYPR I PRDEAFG 670  
Cow GFVRSQERRLLKKT I SGTFLRRFSETSEGGI TCSWVEHQDDDKVLY I SVQPFTEVQLS LPLTK I I RHYQLL TEEN I PENPLR FLYPR I PRDEAFG 677

*P. rodricensis* CYYEDKVNLEQRKYLKHKLI I VVSNRQVDELQQLPELNLEPEAES LELYPGLAPEPEPGLGLELEPLL KAGLDLGP LERML ----- EPTPGTV 766  
*P. vamyryus* (edited) CYYEDKVNLEQRKYLKHKLI I VVSNRQVDELQQLPELNLEPEAES LELYPGLAPEPEPGLGLELEPLL KAGLDLGP LERML ----- EPTPGTV 766  
*P. vamyryus* (unedited) CYYEDKVNLEQRKYLKHKLI I VVSNRQVDELQQLPELNLEPEAES LELYPGLAPEPEPGLGLELEPLL KAGLDLGP LERML ----- EPTPGTV 756  
Human CYYQEKVNLEQRKYLKHKLI I VVSNRQVDELQQLPELNLEPEAES LELYPGLAPEPEPGLGLELEPLL KAGLDLGP LERML ----- EPTPGTV 762  
Panda RYYQEKVNLEQRKYLKHKLI I VVSNRQVDELQQLPELNLEPEAES LELYPGLAPEPEPGLGLELEPLL KAGLDLGP LERML ----- EPTPGTV 764  
Ferret RYYQEKVNLEQRKYLKHKLI I VVSNRQVDELQQLPELNLEPEAES LELYPGLAPEPEPGLGLELEPLL KAGLDLGP LERML ----- EPTPGTV 764  
Dog CYYQEKVNLEQRKYLKHKLI I VVSNRQVDELQQLPELNLEPEAES LELYPGLAPEPEPGLGLELEPLL KAGLDLGP LERML ----- EPTPGTV 766  
Horse RYYQEKVNLEQRKYLKHKLI I VVSNRQVDELQQLPELNLEPEAES LELYPGLAPEPEPGLGLELEPLL KAGLDLGP LERML ----- EPTPGTV 757  
Pig CYNQEKANLEQRKYLKHKLI I VVSNRQVDELQQLPELNLEPEAES LELYPGLAPEPEPGLGLELEPLL KAGLDLGP LERML ----- EPTPGTV 767  
Cow CYSQEKINLEQRKYLKHKLI I VVSNRQVDELQQLPELNLEPEAES LELYPGLAPEPEPGLGLELEPLL KAGLDLGP LERML ----- EPTPGTV 768

*P. rodricensis* SQGMS E L N L G P E L K L E P I L G P I S Q P V P E P D L P H D L E H L N T E E M E I F R N S M N I E D I M P N G D P L L A D Q N T V D E A Y I L H P S H F H T E G P L I P S D Y 857  
*P. vamyryus* (edited) SQGMS E L N L G P E L K L E P I L G P I S Q P V P E P D L P H D L E H L N T E E M E I F R N S M N I E D I M P N G D P L L A D Q N T V D E A Y I L H P S H F H T E G P L I P S D Y 857  
*P. vamyryus* (unedited) SQGMS E L N L G P E L K L E P I L G P I S Q P V P E P D L P H D L E H L N T E E M E I F R N S M N I E D I M P N G D P L L A D Q N T V D E A Y I L H P S H F H T E P L I S D Y 836  
Human I E P T L C M V S Q T V P -- -- -- -- -- I S Q P V P E P D L P H D L E H L N T E E M E I F R N S M N I E D I M P N G D P L L A D Q N T V D E A Y I L H P S H F H T E G P L I P S D Y 851  
Panda -- R R V S E P D V G P E L K L E P I L D P A S Q A V P E P D L P H D L E H L N T E E M E I F R N S M N I E E I M N G D P L F A G Q N T V D E A Y I L H P S H F H T E G P L I P S D Y 854  
Ferret -- A C M P E P N V G P E L K L E P I L D P A S Q A V P E P D L P H D L E H L N T E E M E I F R N S M N I E E I M N G D P L F A G Q N T V D E A Y I L H P S H F H T E G P L I P S D Y 853  
Dog P Q G V S E P D L G P E L K L E P I L D P A S Q A V P E P D L P H D L E H L N T E E M E I F R N S M N I E E I M P N G D P L L A G Q N T V D E A Y I L H P S H F H T E G P L I P S D Y 857  
Horse -- S G V P E P N L G P E L K L E P I L E R I S Q E P V P E P D L P H D L E H L N T E E M E I F R N S M N I E E I M P N G D P L L A G Q N T V D E A Y I L H P S H F H T E G P L I P S D Y 847  
Pig L Q G V P E P N L G P E L K L E P I L E P V S Q P V P E P D L P H D L E H L N T E E M E I F R N S M N I E E I M P N G D P L L A S Q N T V D E A C V I L H P S H F H T E G P L I P S D Y 859  
Cow S Q G V L E P H P G P Q L Q L E P I P E L E L Q P M P E P D L P D L R H L N T E E M E I F R N S M N I E E I M P N G D P L L A Q N T V D E A D I L H P S H F H T E G P L I P S D Y 859
